# Supplementary material for: Negotiating public-health intellectual property licensing agreements to increase access to health technologies: an insider’s story
Source: PubMed Central journal article supplement — BMJ Glob Health. 2023 Sep 4;8(9):e012964. doi: 10.1136/bmjgh-2023-012964 (PMC10496684; doi:10.1136/bmjgh-2023-012964), 2023-09-04
Supplement: bmjgh-2023-012964supp001.pdf [file bmjgh-2023-012964supp001.pdf]

**Online supplemental appendix:****Overview of selected MPP licences relative to key features discussed in the main article**Available online at: <https://dx.doi.org/10.1136/bmjgh-2023-012964>**Negotiating public-health intellectual property licensing agreements to increase access to health technologies: an insider's story**Charles Gore, LLB<sup>1</sup>, Sébastien Morin, PhD<sup>2</sup>, John-Arne Rottingen, MD PhD<sup>3,4</sup>, Marie Paule Kieny, PhD<sup>3</sup>

1. Management, Medicines Patent Pool, Geneva, Switzerland
2. Policy, Strategy and Market Access, Medicines Patent Pool, Geneva, Switzerland
3. Governance Board, Medicines Patent Pool, Geneva, Switzerland
4. Global Health, Norwegian Ministry of Foreign Affairs, Oslo, Norway

**Corresponding author**

Sébastien Morin, PhD  
 Medicines Patent Pool  
 Rue de Varembe 7  
 CH-1202 Geneva  
 Switzerland  
 Email: [smorin@mppf.ch](mailto:smorin@mppf.ch)

**Disclaimer**

This appendix summarizes, in lay language, the key features of MPP licences for HIV, HCV, COVID-19, and cancer medicines. In case of any doubt, language in the individual licensing agreements prevails, and the interested reader is accordingly invited to directly refer to those specific individual licensing agreements (publicly available on MPP's website at: <https://medicinespatentpool.org/progress-achievements/licences>) for the exact legal language around any specific clause. Complementary country-specific patenting and licensing information is available on the MPP medicines patents and licences public database MedsPaL ([www.medsपाल.org](http://www.medsपाल.org)). The appendix information was verified as current on 28 August 2023. Information on any subsequent improvements or other changes to any of the licences presented in the appendix may be found on the corresponding MPP webpages for those licences.

**Table of content**

- |                                                                       |        |
|-----------------------------------------------------------------------|--------|
| • Table S-1. Overview of selected MPP licences for HIV medicines      | Page 2 |
| • Table S-2. Overview of selected MPP licences for HCV medicines      | Page 6 |
| • Table S-3. Overview of selected MPP licences for COVID-19 medicines | Page 7 |
| • Table S-4. Overview of selected MPP licences for cancer medicines   | Page 8 |
| • References                                                          | Page 9 |

**Abbreviations**

- |          |                                                                                                 |
|----------|-------------------------------------------------------------------------------------------------|
| • API    | Active pharmaceutical ingredient                                                                |
| • ARVs   | Antiretrovirals                                                                                 |
| • ATOM   | Access to Oncology Medicine Coalition                                                           |
| • DNDi   | Drugs for Neglected Diseases initiative                                                         |
| • EU     | European Union                                                                                  |
| • HIC    | High-income country                                                                             |
| • LIC    | Low-income country                                                                              |
| • LMIC   | Low- and middle-income country                                                                  |
| • MIC    | Middle-income country                                                                           |
| • PHEIC  | Public health emergency of international concern                                                |
| • PLHIV  | People living with HIV                                                                          |
| • RTV    | Ritonavir (also defined as “r” when referred to as part of a combination with lopinavir: LPV/r) |
| • UMIC   | Upper-middle-income country                                                                     |
| • USA    | United States of America                                                                        |
| • US FDA | United States Food and Drug Administration                                                      |
| • US NIH | United States National Institute of Health                                                      |
| • WHO    | World Health Organization                                                                       |

**Table S-1. Overview of selected MPP licences for HIV medicines**

| Licence                                | Patent holder                | Indication                                                                                                                          | Population    | Year | Original nominal territory (# countries) | Nominal territory expansion (# countries)       | Sales outside of the nominal territory <sup>A</sup>                                                                                                                                           | Data exclusivity waiver | Royalties                                                                                                                                                                                                                                                 | Market segmentation                                                                                                                                     | Compound patent expiry <sup>B</sup> | Sublicensing                                                                                                                                                                                                                    | Grant back rights                                                                                                                                                                                                                                   | Combinations                                                                                                   | Technology transfer                                                                                                                   | Source |
|----------------------------------------|------------------------------|-------------------------------------------------------------------------------------------------------------------------------------|---------------|------|------------------------------------------|-------------------------------------------------|-----------------------------------------------------------------------------------------------------------------------------------------------------------------------------------------------|-------------------------|-----------------------------------------------------------------------------------------------------------------------------------------------------------------------------------------------------------------------------------------------------------|---------------------------------------------------------------------------------------------------------------------------------------------------------|-------------------------------------|---------------------------------------------------------------------------------------------------------------------------------------------------------------------------------------------------------------------------------|-----------------------------------------------------------------------------------------------------------------------------------------------------------------------------------------------------------------------------------------------------|----------------------------------------------------------------------------------------------------------------|---------------------------------------------------------------------------------------------------------------------------------------|--------|
| <b>Abacavir (ABC)</b><br>– Paediatrics | ViiV Healthcare              | HIV treatment                                                                                                                       | Paediatric    | 2013 | 118 countries                            | +3 in 2014<br>121 countries nominally included  | Sales outside the nominal territory permitted if no granted patent is being infringed, including in the case of a compulsory licence                                                          | Yes                     | Royalty-free                                                                                                                                                                                                                                              | -                                                                                                                                                       | 2010                                | Sublicensees can be issued to qualified entities worldwide                                                                                                                                                                      | Sublicensee to grant to ViiV and MPP a perpetual, irrevocable, worldwide, royalty free, non-exclusive licence to use improvements, improvement patents and related know-how                                                                         | Sublicensees have the right to combine ABC with other ARVs and to develop new fixed-dose combinations          | -                                                                                                                                     | [1]    |
| <b>Atazanavir (ATV)</b>                | Bristol-Myers Squibb         | Prevention, treatment or control of HIV and AIDS                                                                                    | Not specified | 2013 | 110 countries                            | +12 in 2017<br>122 countries nominally included | Sales outside the nominal territory permitted for manufacturers that do not rely on BMS technology and if no granted patent is being infringed, including in the case of a compulsory licence | Yes                     | 3 % royalties (not payable for paediatric formulations or for sales of adult formulations in Sub-Saharan Africa and India)<br><br>Royalties to be collected by MPP and channelled to a community-based HIV organization in the country paying the royalty | -                                                                                                                                                       | 2017                                | Sublicensees can be issued to qualified entities worldwide                                                                                                                                                                      | Sublicensee to grant BMS and MPP a non-exclusive, perpetual, worldwide, royalty-free licence to use any such invention and any related intellectual property                                                                                        | Sublicensees have the right to combine ATV with other ARVs and to develop new fixed-dose combinations          | A technology transfer package is provided to all the sub-licensees, but there is no obligation to use the technology                  | [2]    |
| <b>Bictegravir (BIC)</b>               | Gilead Sciences <sup>C</sup> | Any use that is consistent with the label approved by the US FDA or applicable national regulatory authority in the country of sale | Not specified | 2017 | 116 countries                            | +1 in 2019<br>117 countries nominally included  | Sales outside the nominal territory permitted in the case of a compulsory licence                                                                                                             | Yes                     | 5% royalties (not for APIs and paediatric formulations)                                                                                                                                                                                                   | -                                                                                                                                                       | 2033                                | Sublicensees can be issued to entities based in China, India, and South Africa                                                                                                                                                  | Sublicensee to grant Gilead Sciences and MPP a non-exclusive, royalty-free, worldwide, sublicensable licence to all improvements, methods, modifications, and other know-how developed by or on behalf of licensee and relating to API or a product | Sublicensees have the right to combine BIC with other ARVs and to develop suitable new fixed-dose combinations | All Indian and South-African sub-licensees benefit from a one-time technology transfer                                                | [3]    |
| <b>Cabotegravir (CAB)</b>              | ViiV Healthcare              | HIV prevention                                                                                                                      | Not specified | 2022 | 90 countries                             | -<br>90 countries nominally included            | Sales outside the nominal territory permitted if no granted patent is being infringed, including in the case of a compulsory licence                                                          | Yes                     | 5% royalties for 10 countries where ViiV holds patent rights: Algeria, Egypt, India, Indonesia, Kyrgyzstan, Morocco, Philippines, Tajikistan, Ukraine, Vietnam                                                                                            | Limitation to the public market only for 10 countries: Algeria, Egypt, India, Indonesia, Kyrgyzstan, Morocco, Philippines, Tajikistan, Ukraine, Vietnam | 2031                                | Sublicensees can be issued to any qualified entity worldwide<br><br>The number of sublicensees is limited to three, with a possibility to have additional sublicensees if the evidence demonstrates a public health need for it | Sublicensee to grant ViiV and MPP a perpetual, irrevocable, worldwide, royalty-free, non-exclusive licence to use improvements, improvement patents and related know-how                                                                            | -                                                                                                              | A technology transfer package will be provided by ViiV Healthcare to each sublicensee as defined in a separate agreement <sup>D</sup> | [4]    |

| Licence                                 | Patent holder                | Indication                                                                                                                          | Population    | Year | Original nominal territory (# countries) | Nominal territory expansion (# countries)                                  | Sales outside of the nominal territory <sup>A</sup>                                                                                  | Data exclusivity waiver | Royalties                                                                                                                                                                                                 | Market segmentation                                                                                                                                                                | Compound patent expiry <sup>B</sup> | Sublicensing                                                                                                                        | Grant back rights                                                                                                                                                                                                                                   | Combinations                                                                                                    | Technology transfer                                                                    | Source |
|-----------------------------------------|------------------------------|-------------------------------------------------------------------------------------------------------------------------------------|---------------|------|------------------------------------------|----------------------------------------------------------------------------|--------------------------------------------------------------------------------------------------------------------------------------|-------------------------|-----------------------------------------------------------------------------------------------------------------------------------------------------------------------------------------------------------|------------------------------------------------------------------------------------------------------------------------------------------------------------------------------------|-------------------------------------|-------------------------------------------------------------------------------------------------------------------------------------|-----------------------------------------------------------------------------------------------------------------------------------------------------------------------------------------------------------------------------------------------------|-----------------------------------------------------------------------------------------------------------------|----------------------------------------------------------------------------------------|--------|
| <b>Cobicistat (COBI)</b>                | Gilead Sciences <sup>C</sup> | Any use that is consistent with the label approved by the US FDA or applicable national regulatory authority in the country of sale | Not specified | 2011 | 112 countries                            | +4 in 2017<br>+1 in 2019<br>117 countries nominally included               | Sales outside the nominal territory permitted in the case of a compulsory licence                                                    | Yes                     | 5% royalties (not for APIs and paediatric formulations)                                                                                                                                                   | -                                                                                                                                                                                  | 2028                                | Sublicensees can be issued to entities based in China, India, and South Africa                                                      | Sublicensee to grant Gilead Sciences and MPP a non-exclusive, royalty-free, worldwide, sublicensable licence to all improvements, methods, modifications, and other know-how developed by or on behalf of licensee and relating to API or a product | Sublicensees have the right to combine COBI with other ARVs and to develop suitable new fixed-dose combinations | All Indian and South-African sub-licensees benefit from a one-time technology transfer | [5]    |
| <b>Darunavir (DRV)<sup>E</sup></b>      | US NIH                       | Treatment and prevention of medical conditions affecting humans                                                                     | Not specified | 2010 | 137 countries (granted for all LMICs)    | -<br>137 countries nominally included                                      | -                                                                                                                                    | -                       | Royalty-free                                                                                                                                                                                              | -                                                                                                                                                                                  | 2013/2014                           | Sublicensees can be issued to qualified entities worldwide                                                                          | -                                                                                                                                                                                                                                                   | -                                                                                                               | -                                                                                      | [6]    |
| <b>Dolutegravir (DTG) – Adults</b>      | ViiV Healthcare              | HIV treatment                                                                                                                       | Adults        | 2014 | 73 countries                             | +19 in 2016<br>+2 in 2018<br>+1 in 2020<br>95 countries nominally included | Sales outside the nominal territory permitted if no granted patent is being infringed, including in the case of a compulsory licence | Yes                     | Variable royalties depending on country:<br>• 5% for India, Moldova, Philippines, Vietnam<br>• 7.5% for Algeria, Armenia, Egypt, Indonesia, Mongolia, Morocco, Tunisia, Ukraine<br>• 10% for Turkmenistan | Limitation to the public market only for 13 countries: Algeria, Armenia, Egypt, India, Indonesia, Moldova, Mongolia, Morocco, Philippines, Tunisia, Turkmenistan, Ukraine, Vietnam | 2026                                | Sublicensees can be issued to qualified entities worldwide                                                                          | Sublicensee to grant ViiV and MPP a perpetual, irrevocable, worldwide, royalty-free, non-exclusive licence to use improvements, improvement patents and related know-how                                                                            | Sublicensees have the right to combine DTG with other ARVs and to develop suitable new fixed-dose combinations  | -                                                                                      | [7]    |
| <b>Dolutegravir (DTG) – 4 UMICs</b>     | ViiV Healthcare              | HIV treatment                                                                                                                       | Adults        | 2020 | 4 countries                              | -<br>4 countries nominally included                                        | Sales outside the nominal territory permitted if no granted patent is being infringed, including in the case of a compulsory licence | Yes                     | Tiered per-pack royalty rates (kept confidential) based on percentage of PLHIV treated with DTG <sup>F</sup>                                                                                              | Limitation to the public market only for 4 countries: Azerbaijan, Belarus, Kazakhstan, Malaysia                                                                                    | 2026                                | Sublicensees can be issued to qualified entities worldwide<br><br>The number of sublicensees is limited to three due to market size | Sublicensee to grant ViiV and MPP a perpetual, irrevocable, worldwide, royalty-free, non-exclusive licence to use improvements, improvement patents and related know-how                                                                            | Sublicensees have the right to combine DTG with other ARVs and to develop suitable new fixed-dose combinations  | -                                                                                      | [8]    |
| <b>Dolutegravir (DTG) – Paediatrics</b> | ViiV Healthcare              | HIV treatment                                                                                                                       | Paediatric    | 2014 | 123 countries                            | +2 in 2020<br>125 countries nominally included                             | Sales outside the nominal territory permitted if no granted patent is being infringed, including in the case of a compulsory licence | Yes                     | Royalty-free                                                                                                                                                                                              | -                                                                                                                                                                                  | 2026                                | Sublicensees can be issued to any qualified entity worldwide                                                                        | Sublicensee to grant ViiV and MPP a perpetual, irrevocable, worldwide, royalty-free, non-exclusive licence to use improvements, improvement patents and related know-how                                                                            | Sublicensees have the right to combine DTG with other ARVs and to develop suitable new fixed-dose combinations  | -                                                                                      | [9]    |

| Licence                                            | Patent holder                | Indication                                                                                                                          | Population                             | Year | Original nominal territory (# countries) | Nominal territory expansion (# countries)                    | Sales outside of the nominal territory <sup>A</sup>                                                                                  | Data exclusivity waiver | Royalties                                               | Market segmentation | Compound patent expiry <sup>B</sup>                                                   | Sublicensing                                                                   | Grant back rights                                                                                                                                                                                                                                   | Combinations                                                                                                          | Technology transfer                                                                    | Source |
|----------------------------------------------------|------------------------------|-------------------------------------------------------------------------------------------------------------------------------------|----------------------------------------|------|------------------------------------------|--------------------------------------------------------------|--------------------------------------------------------------------------------------------------------------------------------------|-------------------------|---------------------------------------------------------|---------------------|---------------------------------------------------------------------------------------|--------------------------------------------------------------------------------|-----------------------------------------------------------------------------------------------------------------------------------------------------------------------------------------------------------------------------------------------------|-----------------------------------------------------------------------------------------------------------------------|----------------------------------------------------------------------------------------|--------|
| <b>Elvitegravir (EVG)</b>                          | Gilead Sciences <sup>C</sup> | Any use that is consistent with the label approved by the US FDA or applicable national regulatory authority in the country of sale | Not specified                          | 2011 | 100 countries                            | +9 in 2017<br>109 countries nominally included               | Sales outside the nominal territory permitted in the case of a compulsory licence                                                    | Yes                     | 5% royalties (not for APIs and paediatric formulations) | -                   | 2023                                                                                  | Sublicensees can be issued to entities based in China, India, and South Africa | Sublicensee to grant Gilead Sciences and MPP a non-exclusive, royalty-free, worldwide, sublicensable licence to all improvements, methods, modifications, and other know-how developed by or on behalf of licensee and relating to API or a product | Sublicensees have the right to combine EVG with other ARVs and to develop suitable new fixed-dose combinations        | All Indian and South-African sub-licensees benefit from a one-time technology transfer | [10]   |
| <b>Emtricitabine (FTC)</b>                         | Gilead Sciences <sup>C</sup> | Any use that is consistent with the label approved by the US FDA or applicable national regulatory authority in the country of sale | Not specified                          | 2011 | 112 countries                            | +4 in 2017<br>+1 in 2019<br>117 countries nominally included | Sales outside the nominal territory permitted in the case of a compulsory licence                                                    | Yes                     | Royalty-free                                            | -                   | 2012                                                                                  | Sublicensees can be issued to entities based in China, India, and South Africa | Sublicensee to grant Gilead Sciences and MPP a non-exclusive, royalty-free, worldwide, sublicensable licence to all improvements, methods, modifications, and other know-how developed by or on behalf of licensee and relating to API or a product | Sublicensees have the right to combine FTC with other ARVs and to develop suitable new fixed-dose combinations        | All Indian and South-African sub-licensees benefit from a one-time technology transfer | [11]   |
| <b>Lopinavir / ritonavir (LPV/r) – Adults</b>      | AbbVie                       | HIV treatment                                                                                                                       | Adult                                  | 2015 | 54 countries                             | Now worldwide (patents not enforced since 2020)              | Sales outside the nominal territory permitted if no granted patent is being infringed, including in the case of a compulsory licence | Yes                     | Royalty-free                                            | -                   | 2016/2013 (in addition to key secondary patent on heat-stable formulation until 2024) | Sublicensees can be issued to any qualified entity worldwide                   | -                                                                                                                                                                                                                                                   | Sublicensees have the right to combine LPV or RTV with other ARVs and to develop suitable new fixed-dose combinations | -                                                                                      | [12]   |
| <b>Lopinavir / ritonavir (LPV/r) – Paediatrics</b> | AbbVie                       | HIV treatment or prevention                                                                                                         | Paediatric HIV treatment or prevention | 2014 | 102 countries                            | Now worldwide (patents not enforced since 2020)              | Sales outside the nominal territory permitted if no granted patent is being infringed, including in the case of a compulsory licence | Yes                     | Royalty-free                                            | -                   | 2016/2013 (in addition to key secondary patent on heat-stable formulation until 2024) | Sublicensees can be issued to any qualified entity worldwide                   | -                                                                                                                                                                                                                                                   | Sublicensees have the right to combine LPV or RTV with other ARVs and to develop suitable new fixed-dose combinations | -                                                                                      | [13]   |
| <b>Raltegravir (RAL) – Paediatrics</b>             | MSD                          | HIV treatment                                                                                                                       | Children under 12 years of age         | 2015 | 92 countries                             | -<br>92 countries nominally included                         | Sales outside the nominal territory permitted if no granted patent is being infringed, including in the case of a compulsory licence | Yes                     | Royalty-free                                            | -                   | 2024                                                                                  | Sublicensees can be issued to any qualified entity worldwide                   | Sublicensee to grant MSD and MPP a royalty-free, non-exclusive, sublicensable licence to any patented improvement. Merck is also granted a right of first refusal to negotiate a new formulation outside the territory                              | Sublicensees have the right to combine RAL with other ARVs and to develop suitable new fixed-dose combinations        | -                                                                                      | [14]   |

| Licence                                                | Patent holder                | Indication                                                                                                                          | Population                                                                                    | Year | Original nominal territory (# countries) | Nominal territory expansion (# countries)                    | Sales outside of the nominal territory <sup>A</sup>                               | Data exclusivity waiver | Royalties                                                 | Market segmentation | Compound patent expiry <sup>B</sup> | Sublicensing                                                                  | Grant back rights                                                                                                                                                                                                                                   | Combinations                                                                                                   | Technology transfer                                                                    | Source |
|--------------------------------------------------------|------------------------------|-------------------------------------------------------------------------------------------------------------------------------------|-----------------------------------------------------------------------------------------------|------|------------------------------------------|--------------------------------------------------------------|-----------------------------------------------------------------------------------|-------------------------|-----------------------------------------------------------|---------------------|-------------------------------------|-------------------------------------------------------------------------------|-----------------------------------------------------------------------------------------------------------------------------------------------------------------------------------------------------------------------------------------------------|----------------------------------------------------------------------------------------------------------------|----------------------------------------------------------------------------------------|--------|
| <b>Tenofovir alafenamide (TAF)</b>                     | Gilead Sciences <sup>C</sup> | Any use that is consistent with the label approved by the US FDA or applicable national regulatory authority in the country of sale | Not specified                                                                                 | 2014 | 112 countries                            | +4 in 2017<br>+1 in 2019<br>117 countries nominally included | Sales outside the nominal territory permitted in the case of a compulsory licence | Yes                     | 5% royalties (not for APIs and paediatric formulations)   | -                   | 2021                                | Sublicences can be issued to entities based in China, India, and South Africa | Sublicensee to grant Gilead Sciences and MPP a non-exclusive, royalty-free, worldwide, sublicensable licence to all improvements, methods, modifications, and other know-how developed by or on behalf of licensee and relating to API or a product | Sublicensees have the right to combine TAF with other ARVs and to develop suitable new fixed-dose combinations | All Indian and South-African sub-licensees benefit from a one-time technology transfer | [15]   |
| <b>Tenofovir disoproxil fumarate (TDF)<sup>C</sup></b> | Gilead Sciences <sup>C</sup> | Any use that is consistent with the label approved by the US FDA or applicable national regulatory authority in the country of sale | Adult and paediatric (with sales of paediatric formulations prohibited above 12 years of age) | 2011 | 112 countries                            | +4 in 2017<br>+1 in 2019<br>117 countries nominally included | Sales outside the nominal territory permitted in the case of a compulsory licence | Yes                     | 3-5% royalties (not for APIs and paediatric formulations) | -                   | 2017                                | Sublicences can be issued to entities based in China, India, and South Africa | Sublicensee to grant Gilead Sciences and MPP a non-exclusive, royalty-free, worldwide, sublicensable licence to all improvements, methods, modifications, and other know-how developed by or on behalf of licensee and relating to API or a product | Sublicensees have the right to combine TDF with other ARVs and to develop suitable new fixed-dose combinations | All Indian and South-African sub-licensees benefit from a one-time technology transfer | [16]   |

- A. Information on the effective allowed territory for MPP-licensed products is available on MPP's Access to Medicines Tracker's Interactive Map on the MPP website at: <https://medicinespatentpool.org/progress-achievements/access-to-medicines-tracker>.
- B. Compound patent expiry dates shown in this document are generally 20 years from the filing of the patent application. Exact country-specific dates of expiry may vary as a result of differences in national patent laws or the existence of patent term extensions in some jurisdictions. For country-specific patent information (including for any secondary patents), the reader is invited to consult the MPP medicines patents and licences public database MedsPaL at: [www.medspal.org](http://www.medspal.org).
- C. All the HIV medicines licensed by Gilead Sciences to MPP are part of the same overall licence and benefit from the same overall terms and conditions.
- D. The terms of a separate agreement defining a technology transfer package to be provided by ViiV Healthcare to each sublicensee for CAB are currently under discussion.
- E. This MPP-US NIH licence does not cover all patents for DRV (and in 2015 MPP also collaborated with patent holder Janssen in expanding its commitment not to enforce patents on paediatric darunavir – see <https://medicinespatentpool.org/news-publications-post/the-medicines-patent-pool-on-janssens-extension-of-its-access-policy-for-paediatric-medicine-darunavir>).
- F. The tiered royalty rates related to the licence for DTG for 4 UMICs are kept confidential. This is the sole exception to transparency in any MPP licence, and in its November 2020 resolution the MPP Governance Board reiterated “MPP's continued commitment to transparency” (see [https://medicinespatentpool.org/uploads/2020/04/Board-Decision\\_UMIC-DTG-Licence\\_Nov20.pdf](https://medicinespatentpool.org/uploads/2020/04/Board-Decision_UMIC-DTG-Licence_Nov20.pdf)).
- G. Similarly to other MPP licences, the MPP-Gilead Sciences licence (that covers all HIV medicines licensed by Gilead Sciences to MPP, including TDF<sup>C</sup>) allows licensees the right to terminate the agreement at any time on a product-by-product basis. Four companies have taken that overall licence and terminated the TDF part, allowing them to supply additional countries in which TDF was not patented.

**Table S-2. Overview of selected MPP licences for HCV medicines**

| Licence                                 | Patent holder        | Indication    | Population    | Year | Original nominal territory (# countries) | Nominal territory expansion (# countries)    | Sales outside the nominal territory <sup>A</sup>                                                                                                                                          | Data exclusivity waiver | Royalties                                                                                           | Market segmentation | Compound patent expiry <sup>B</sup> | Sublicensing                                                                     | Grant back rights                                                                                                                                                             | Combinations                                                                                           | Technology transfer                                                                                                                                                                | Source |
|-----------------------------------------|----------------------|---------------|---------------|------|------------------------------------------|----------------------------------------------|-------------------------------------------------------------------------------------------------------------------------------------------------------------------------------------------|-------------------------|-----------------------------------------------------------------------------------------------------|---------------------|-------------------------------------|----------------------------------------------------------------------------------|-------------------------------------------------------------------------------------------------------------------------------------------------------------------------------|--------------------------------------------------------------------------------------------------------|------------------------------------------------------------------------------------------------------------------------------------------------------------------------------------|--------|
| <b>Daclatasvir (DAC)</b>                | Bristol-Myers Squibb | HCV treatment | Not specified | 2015 | 112 countries                            | +31 in 2020/21 <sup>I</sup><br>143 countries | Sales outside the nominal territory permitted for manufacturers that do not rely on BMS technology if no granted patent is being infringed, including in the case of a compulsory licence | Yes                     | Royalty-free                                                                                        | -                   | 2027 <sup>1</sup>                   | Sublicensees can be issued to qualified entities worldwide                       | Sublicensee to grant BMS and MPP a non-exclusive, perpetual, worldwide, royalty-free licence to use any invention and related intellectual property                           | Sublicensees have the right to combine DAC with other drugs and to develop new fixed-dose combinations | A technology transfer package is provided to all the sublicensees, but there is no obligation to use the technology<br><br>Information necessary for registration is also provided | [17]   |
| <b>Glecaprevir / pibrentasvir (G/P)</b> | AbbVie               | HCV treatment | Not specified | 2018 | 95 countries                             | 1 (2019)<br>96 countries nominally included  | Sales outside the nominal territory permitted if no granted patent is being infringed, including in the case of a compulsory licence                                                      | Yes                     | Royalty-free                                                                                        | -                   | 2031                                | Sublicensees can be issued to any qualified entity in the territory and in India | Sublicensee to grant to AbbVie for any new G/P formulation the right to purchase or to license: a sole right for USA and EU, and/or a non-exclusive right for other countries | -                                                                                                      | AbbVie to provide, upon MPP request, a copy of clinical data and all non-commercial and non-manufacturing documents to facilitate product registration                             | [18]   |
| <b>Ravidasvir (RAV) <sup>II</sup></b>   | Pharco               | HCV treatment | Not specified | 2017 | 19 countries                             | -<br>19 countries nominally included         | Sales outside the nominal territory permitted if no granted patent is being infringed, including in the case of a compulsory licence                                                      | Yes                     | 4% royalties for sales in LICs, 7% royalties for sales in MICs, and 12% royalties for sales in HICs | -                   | 2029                                | Sublicensees can be issued to any qualified entity worldwide                     | Sublicensee to grant Pharco and MPP a royalty-free, non-exclusive licence for patented improvements, with possibility for Pharco to sublicense to Presidio                    | -                                                                                                      | -                                                                                                                                                                                  | [19]   |

H. This MPP-Pharco licence for RAV expands the geographic scope of the 2016 Presidio-DNDi licence (which covers 128 countries, see <https://dndi.org/press-releases/2016/dndi-pharco-hepc-malaysia-thailand>), extending coverage to several LMICs that were not included in that other licence.

I. Marketing authorisations and patents for daclatasvir were allowed to lapse in at least 31 countries in 2020-2021.

**Table S-3. Overview of selected MPP licences for COVID-19 medicines**

| Licence                      | Patent holder | Indication                              | Population    | Year | Original nominal territory (# countries) | Nominal territory expansion (# countries) | Sales outside the nominal territory <sup>A</sup>                                                                                                                                                                                                                             | Data exclusivity waiver | Royalties                                                                                                                                                                                                                                                                                                                                                                           | Market segmentation                                                | Compound patent expiry <sup>B</sup> | Sublicensing                                                | Grant back rights                                                                                                                                                                                                                                                                                                                                                                         | Combinations                                                                   | Technology transfer                                                                    | Source |
|------------------------------|---------------|-----------------------------------------|---------------|------|------------------------------------------|-------------------------------------------|------------------------------------------------------------------------------------------------------------------------------------------------------------------------------------------------------------------------------------------------------------------------------|-------------------------|-------------------------------------------------------------------------------------------------------------------------------------------------------------------------------------------------------------------------------------------------------------------------------------------------------------------------------------------------------------------------------------|--------------------------------------------------------------------|-------------------------------------|-------------------------------------------------------------|-------------------------------------------------------------------------------------------------------------------------------------------------------------------------------------------------------------------------------------------------------------------------------------------------------------------------------------------------------------------------------------------|--------------------------------------------------------------------------------|----------------------------------------------------------------------------------------|--------|
| Emsrelvir fumaric acid (ENS) | Shionogi      | Treatment and/or prevention of COVID-19 | Not specified | 2022 | 117 countries                            | -                                         | Sales outside the nominal territory permitted for manufacturers that do not rely on Shionogi licensed know-how and confidential information if no patent is being infringed, including in the case of a compulsory licence                                                   | Yes                     | Variable<br><br>Royalty-free during the WHO PHEIC<br><br>After the WHO PHEIC ends: 5% for sales to governmental authorities or public purchasers and 10% of net sales for commercial entities (except for sales in LICs or for manufacture and sales in countries within the licensed territory where the product is not patented and does not benefit from regulatory exclusivity) | -                                                                  | 2030                                | Sublicences can be issued to any qualified entity worldwide | For COVID-19: Sublicensee to grant Shionogi and MPP a perpetual, irrevocable, worldwide, non-exclusive, transferable, and fully paid-up licence, with the right to grant sublicences through multiple tiers, under any improvements<br><br>Outside COVID-19: Sublicensee to grant Shionogi and MPP a non-exclusive and royalty-free licence, or a sole licence for a fee to be negotiated | -                                                                              | A technical pack is included in the scope of the licence, at the sublicensee's request | [20]   |
|                              |               |                                         |               |      |                                          | 117 countries nominally included          |                                                                                                                                                                                                                                                                              |                         |                                                                                                                                                                                                                                                                                                                                                                                     |                                                                    |                                     |                                                             |                                                                                                                                                                                                                                                                                                                                                                                           |                                                                                |                                                                                        |        |
| Molnupiravir (MOL)           | MSD           | Treatment of COVID-19                   | Not specified | 2021 | 105 countries                            | +1 in 2022                                | Sales outside the nominal territory permitted for manufacturers that do not rely on MSD know-how if no patent is being infringed, including in the case of a compulsory licence                                                                                              | Yes                     | Variable<br><br>Royalty-free during the WHO PHEIC (except for sales to the private sector in South Africa and the public market in Thailand where royalties are also due during the WHO PHEIC)<br><br>After the WHO PHEIC ends: 5% for sales to governmental authorities or public purchasers and 10% of net sales for commercial entities                                          | Limitation to the public market only for one country: Thailand     | 2038                                | Sublicences can be issued to any qualified entity worldwide | For COVID-19: Sublicensee to grant MSD and MPP a perpetual, irrevocable, worldwide, non-exclusive, transferable, and fully paid-up licence, with the right to grant sublicences through multiple tiers, under any improvements<br><br>Outside COVID-19: Sublicensee to grant MSD and MPP a non-exclusive and royalty-free licence, or a sole licence for a fee to be negotiated           | -                                                                              | A technical pack is included in the scope of the licence, at the sublicensee's request | [21]   |
|                              |               |                                         |               |      |                                          | 106 countries nominally included          |                                                                                                                                                                                                                                                                              |                         |                                                                                                                                                                                                                                                                                                                                                                                     |                                                                    |                                     |                                                             |                                                                                                                                                                                                                                                                                                                                                                                           |                                                                                |                                                                                        |        |
| Nirmatrelvir (NIR)           | Pfizer        | Treatment and/or prevention of COVID-19 | Not specified | 2021 | 95 countries                             | -                                         | Sales outside the nominal territory permitted for manufacturers that do not rely on Pfizer licensed know-how and confidential information if no patent or any other intellectual property rights of Pfizer is being infringed, including in the case of a compulsory licence | Yes                     | Variable<br><br>Royalty-free during the WHO PHEIC<br><br>After the WHO PHEIC ends: 5% for sales to governmental authorities or public purchasers and 10% of net sales for commercial entities (except for sales in LICs or for manufacture and sales in countries within the licensed territory where the product is not patented and does not benefit from regulatory exclusivity) | Limitation to the public market only for one country: South Africa | 2041                                | Sublicences can be issued to any qualified entity worldwide | For COVID-19: Sublicensee to grant Pfizer and MPP a perpetual, irrevocable, worldwide, non-exclusive, transferable, and fully paid-up licence, with the right to grant sublicences through multiple tiers, under any improvements<br><br>Outside COVID-19: Sublicensee to grant Pfizer and MPP a non-exclusive and royalty-free licence, or a sole licence for a fee to be negotiated     | The licence is for nirmatrelvir co-packaged and co-administered with ritonavir | A technical pack is included in the scope of the licence, at the sublicensee's request | [22]   |
|                              |               |                                         |               |      |                                          | 95 countries nominally included           |                                                                                                                                                                                                                                                                              |                         |                                                                                                                                                                                                                                                                                                                                                                                     |                                                                    |                                     |                                                             |                                                                                                                                                                                                                                                                                                                                                                                           |                                                                                |                                                                                        |        |

**Table S-4. Overview of selected MPP licences for cancer medicines**

| Licence          | Patent holder | Indication                                           | Population                                 | Year | Original nominal territory (# countries) | Nominal territory expansion (# countries) | Sales outside the nominal territory <sup>A</sup>                                                                                     | Data exclusivity waiver | Royalties                                                               | Market segmentation | Compound patent expiry <sup>B</sup> | Sublicensing                                                                                                                                                                                                                                                                            | Grant back rights                                                                                                                                                                             | Combinations | Technology transfer | Source |
|------------------|---------------|------------------------------------------------------|--------------------------------------------|------|------------------------------------------|-------------------------------------------|--------------------------------------------------------------------------------------------------------------------------------------|-------------------------|-------------------------------------------------------------------------|---------------------|-------------------------------------|-----------------------------------------------------------------------------------------------------------------------------------------------------------------------------------------------------------------------------------------------------------------------------------------|-----------------------------------------------------------------------------------------------------------------------------------------------------------------------------------------------|--------------|---------------------|--------|
| <b>Nilotinib</b> | Novartis      | Any approved use (usually chronic myeloid leukaemia) | Adult and paediatric (above 1 year of age) | 2022 | 44 countries                             | -<br>44 countries nominally included      | Sales outside the nominal territory permitted if no granted patent is being infringed, including in the case of a compulsory licence | Yes                     | 5% royalties payable to ATOM, for sales in a country with valid patents | -                   | 2023                                | The licence allows manufacturing in: Egypt, Guatemala, India, Indonesia, Morocco, Pakistan, Philippines, and Tunisia till July 2023. After that date manufacturing under the licence will be possible anywhere in the world where there are no patents on nilotinib, including in India | Sublicensee to grant Novartis and MPP a perpetual, irrevocable, worldwide, royalty-free, fully paid-up, non-exclusive licence to use any improvement, improvement patent and related know-how | -            | -                   | [23]   |



## References

1. Medicines Patent Pool. Licence for abacavir - paediatrics. 2013. <https://medicinespatentpool.org/licence-post/abacavir-paediatrics-abc> (accessed 3 Apr 2023).
2. Medicines Patent Pool. Licence for atazanavir. 2011. <https://medicinespatentpool.org/licence-post/atazanavir-atv> (accessed 14 Mar 2023).
3. Medicines Patent Pool. Licence for bictegravir. 2017. <https://medicinespatentpool.org/licence-post/bictegravir-bic> (accessed 3 Apr 2023).
4. Medicines Patent Pool. Licence for cabotegravir long-acting (LA) for HIV pre-exposure prophylaxis (PrEP). 2022. <https://medicinespatentpool.org/licence-post/cabotegravir-long-acting-la-for-hiv-pre-exposure-prophylaxis-prep> (accessed 14 Mar 2023).
5. Medicines Patent Pool. Licence for cobicistat. 2011. <https://medicinespatentpool.org/licence-post/cobicistat-cobi> (accessed 3 Apr 2023).
6. Medicines Patent Pool. Licence for patents related to darunavir. 2010. <https://medicinespatentpool.org/licence-post/patents-related-to-darunavir> (accessed 3 Apr 2023).
7. Medicines Patent Pool. Licence for dolutegravir for adults. 2014. <https://medicinespatentpool.org/licence-post/dolutegravir-adult-dtg> (accessed 24 Jan 2023).
8. Medicines Patent Pool. Licence for dolutegravir for adults for AZ, BY, KZ and MY. 2020. <https://medicinespatentpool.org/licence-post/dolutegravir-adult-dtg-for-az-by-kz-and-my> (accessed 24 Apr 2023).
9. Medicines Patent Pool, ViiV Healthcare. Licence for paediatric dolutegravir for HIV treatment. 2014. <https://medicinespatentpool.org/licence-post/dolutegravir-paediatrics-dtg> (accessed 24 Apr 2023).
10. Medicines Patent Pool. Licence for elvitegravir. 2011. <https://medicinespatentpool.org/licence-post/elvitegravir-evg> (accessed 3 Apr 2023).
11. Medicines Patent Pool. Licence for emtricitabine. 2011. <https://medicinespatentpool.org/licence-post/emtricitabine-ftc> (accessed 3 Apr 2023).
12. Medicines Patent Pool. Licence for lopinavir, ritonavir. 2015. <https://medicinespatentpool.org/licence-post/lopinavir-ritonavir-lpv-r> (accessed 3 Apr 2023).
13. Medicines Patent Pool. Licence for lopinavir, ritonavir - paediatrics. 2014. <https://medicinespatentpool.org/licence-post/lopinavir-ritonavir-lpv-r-paediatrics> (accessed 3 Apr 2023).
14. Medicines Patent Pool. Licence for raltegravir - paediatrics. 2015. <https://medicinespatentpool.org/licence-post/raltegravir-ral-paediatrics> (accessed 3 Apr 2023).
15. Medicines Patent Pool. Licence for tenofovir alafenamide. 2014. <https://medicinespatentpool.org/licence-post/tenofovir-alafenamide-taf> (accessed 3 Apr 2023).
16. Medicines Patent Pool. Licence for tenofovir disoproxil fumarate. 2011. <https://medicinespatentpool.org/licence-post/tenofovir-disoproxil-fumarate-tdf> (accessed 14 Mar 2023).
17. Medicines Patent Pool. Licence for daclatasvir. 2015. <https://medicinespatentpool.org/licence-post/daclatasvir-dac> (accessed 3 Apr 2023).
18. Medicines Patent Pool. Licence for glecaprevir/pibrentasvir. 2018. <https://medicinespatentpool.org/licence-post/glecaprevir-pibrentasvir-g-p> (accessed 3 Apr 2023).
19. Medicines Patent Pool. Licence for ravidasvir. 2017. <https://medicinespatentpool.org/licence-post/ravidasvir> (accessed 3 Apr 2023).
20. Medicines Patent Pool. Licence for ensitrelvir fumaric acid. 2022. <https://medicinespatentpool.org/licence-post/ensitrelvir> (accessed 3 Apr 2023).
21. Medicines Patent Pool. Licence for molnupiravir. 2021. <https://medicinespatentpool.org/licence-post/molnupiravir-mol> (accessed 14 Mar 2023).
22. Medicines Patent Pool. Licence for nirmatrelvir. 2021. <https://medicinespatentpool.org/licence-post/pf-07321332> (accessed 3 Apr 2023).
23. Medicines Patent Pool. Licence for nilotinib. 2022. <https://medicinespatentpool.org/licence-post/nilotinib> (accessed 14 Mar 2023).
